# Supplementary material for: New Insight on Hydrogen Evolution Reaction Activity of MoP2 from Theoretical Perspective
Source: MDPI journal article supplement (doi:10.3390/nano9091270), 2019-09-05
Supplement: s1 [file s1]

# Support information

## New Insight on Hydrogen Evolution Reaction Activity of MoP<sub>2</sub> from Theoretical Perspective

Yuyue Gao <sup>1,2</sup>, Hongyan Li <sup>1,2</sup>, Jingyu Wang <sup>3</sup>, Jianyi Ma <sup>1</sup> and Haisheng Ren <sup>2,\*</sup>

<sup>1</sup> Institute of Atomic and Molecular Physics, Sichuan University, Chengdu, 610065, China;  
jianyima@scu.edu.cn

<sup>2</sup> School of Chemical Engineering, Sichuan University, Chengdu, 610065, China;

<sup>3</sup> School of Aeronautics and Astronautics, Sichuan University, Chengdu, Sichuan 610065, China;  
wangjingyu@scu.edu.cn

\* Correspondence: renhs@scu.edu.cn; Tel./Fax: +86 2885402951

**Table S1.** Adsorption energy of the optimized hydrogen adsorption sites for (111) facet.

(unit in eV)

| Adsorption sites | Mo1    | P1     | Mo2   | P2    | Mo1-P2 | Mo1-P3 |
|------------------|--------|--------|-------|-------|--------|--------|
| 111-facet        | -0.106 | -0.038 | 0.083 | 0.402 | 0.251  | 0.016  |

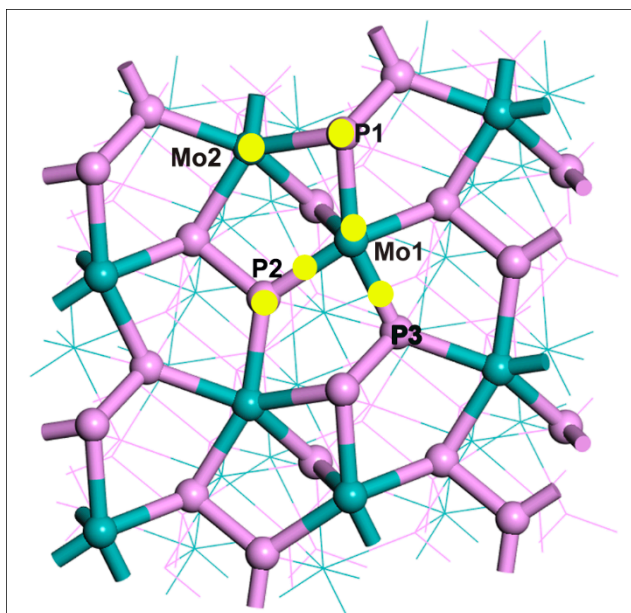

**Figure S1.** All possible adsorption sites on (111) facet.

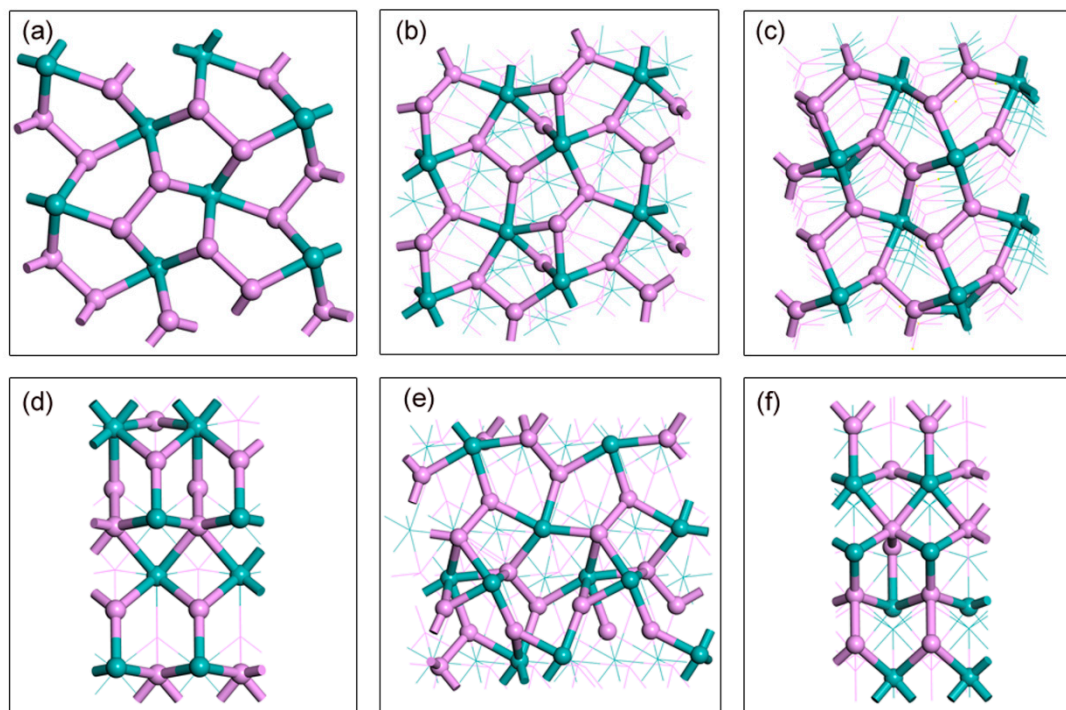

**Figure S2.** Top view of six clean MoP<sub>2</sub> surfaces, including (a) (100), (b) (111), (c) (110), (d) (001), (e) (101) and (f) (011) facets. Mo: dark green; P: purple.
